# Supplementary material for: BEACH domain proteins function as cargo-sorting adaptors in secretory and endocytic pathways
Source: PubMed Central journal article supplement (PMC11554844; doi:10.1083/jcb.202408173), 2024-11-08

Figure 1B

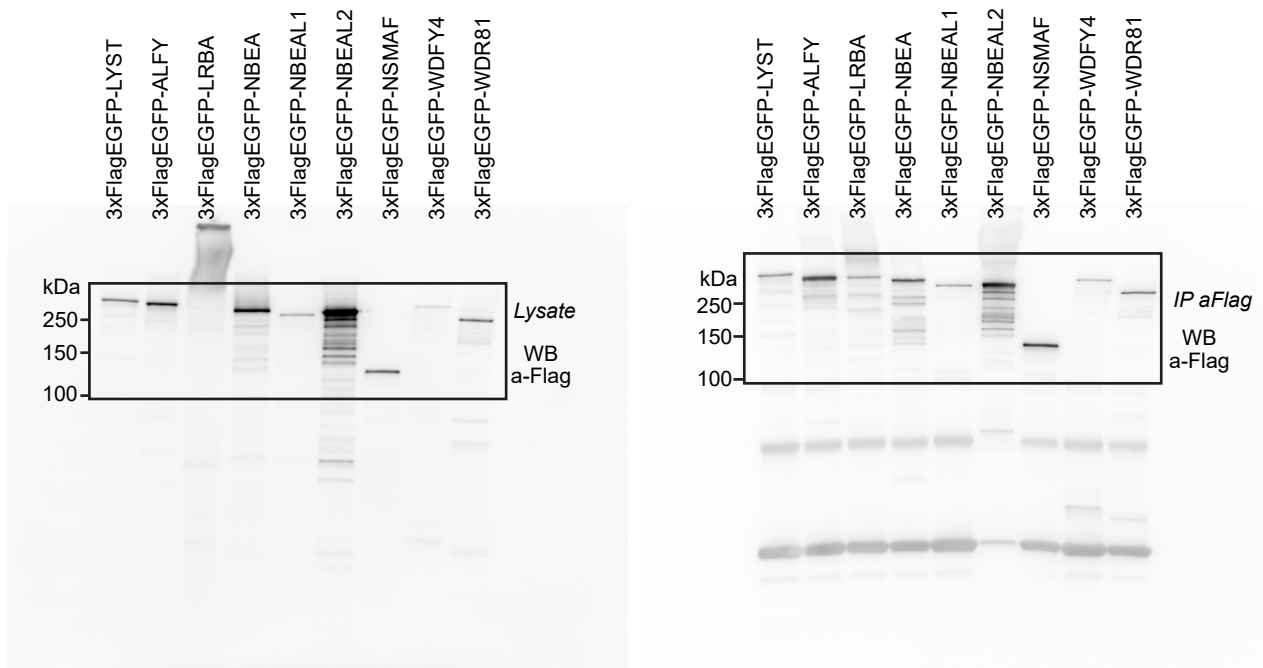

Supplement: JCB_202408173_SourceDataF1.pdf [file JCB_202408173_SourceDataF1.pdf]
