# Supplementary material for: BEACH domain proteins function as cargo-sorting adaptors in secretory and endocytic pathways
Source: PubMed Central journal article supplement (PMC11554844; doi:10.1083/jcb.202408173), 2024-11-08
Supplement: JCB_202408173_SourceDataFS4.pdf [file JCB_202408173_SourceDataFS4.pdf]

S4C

5KO clones

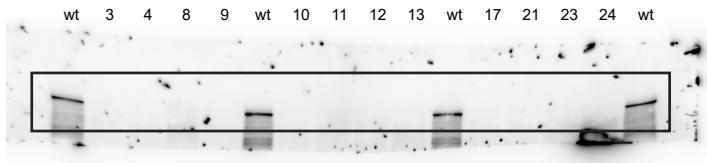

ALFY

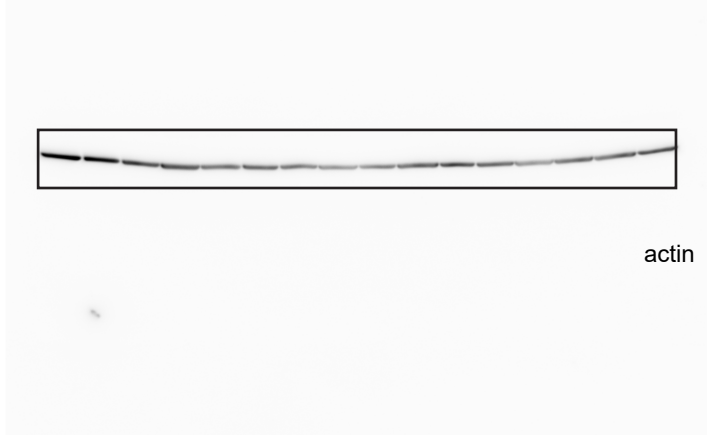

actin

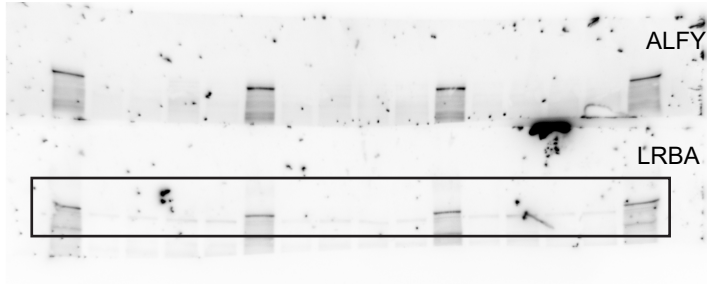

ALFY

LRBA

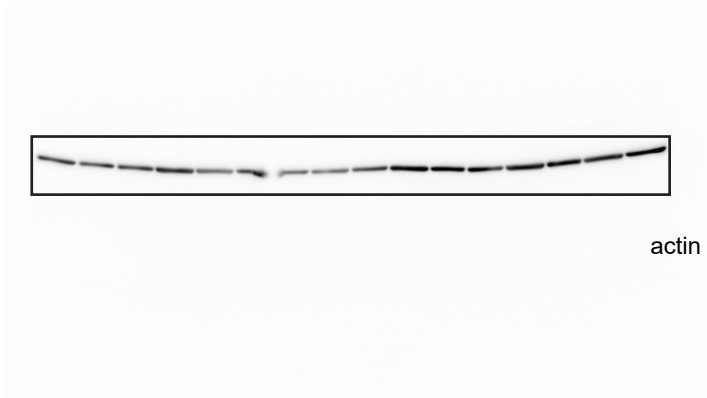

actin

5KO clones

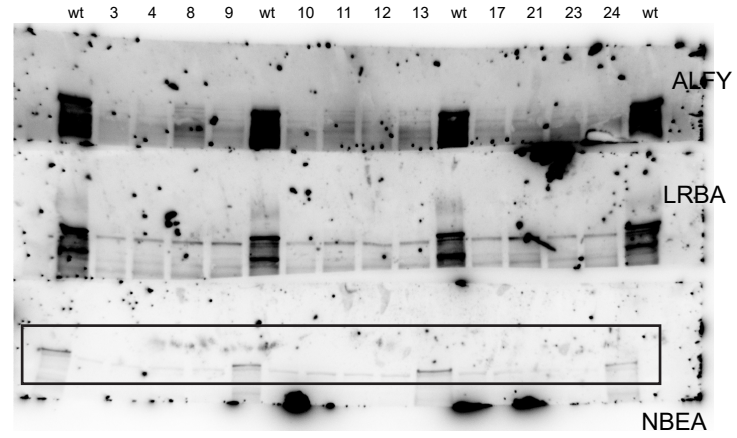

ALFY

LRBA

NBEA

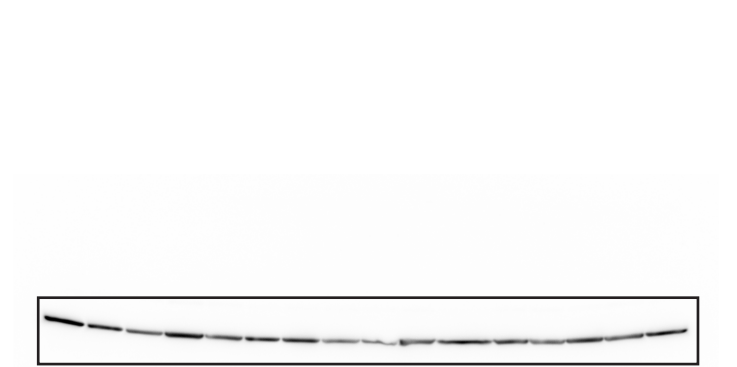

actin

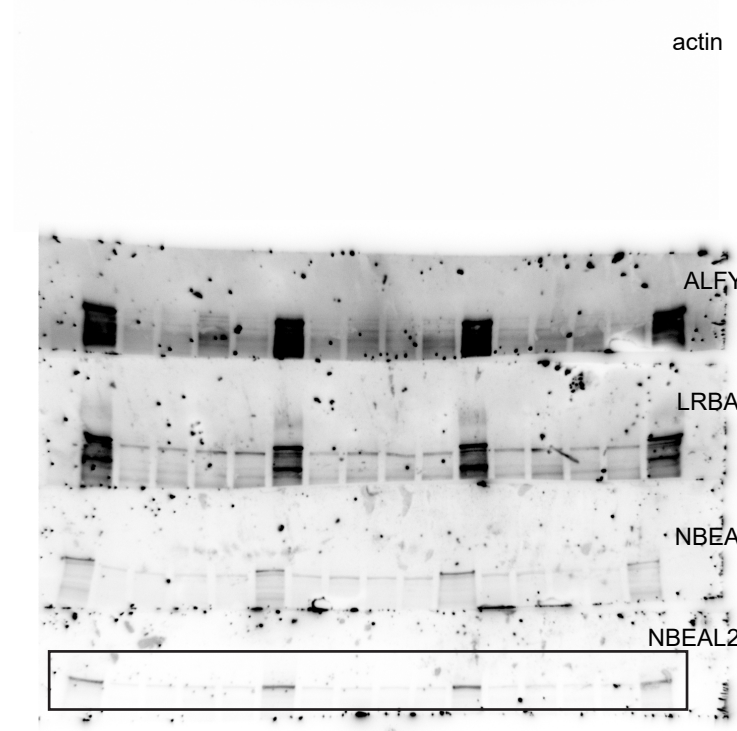

ALFY

LRBA

NBEA

NBEAL2

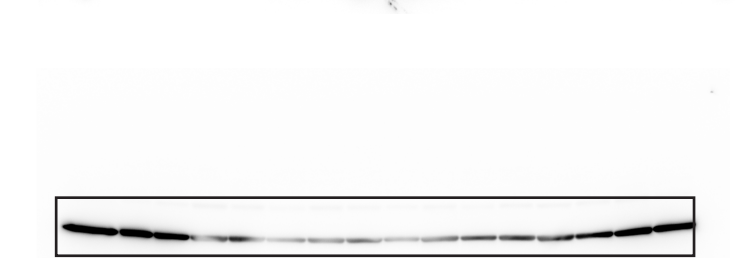

actin
